# Supplementary material for: A robust molecularly imprinted electrochemiluminescence sensor based on a Ni–Co nanoarray for the sensitive detection of spiramycin
Source: Royal Society of Chemistry journal article supplement (doi:10.1039/d2an01497a), 2022-01-01
Supplement: d2an01497a1.pdf [file d2an01497a1.pdf]

Supporting Information

Of

**Robust molecularly imprinted electrochemiluminescence  
sensor based on Ni-Co nanoarray for sensitive detection of  
spiramycin**

Yunxiao Li<sup>a</sup>, Jiwei Xu<sup>a</sup>, Rongqi Cheng<sup>b,c</sup>, Jinghui Yang<sup>a</sup>, ChenChen Li<sup>a,b</sup>,  
Yingchun Liu<sup>a</sup>, Rui Xu<sup>a</sup>, Qin Wei<sup>b</sup> and Yong Zhang<sup>\*a,b</sup>

<sup>a</sup> *Provincial Key Laboratory of Rural Energy Engineering in Yunnan, Yunnan Normal University,  
Kunming 650500, China. Email: [yongzhang7805@126.com](mailto:yongzhang7805@126.com)*

<sup>b</sup> *Key Laboratory of Interfacial Reaction & Sensing Analysis in Universities of Shandong, School  
of Chemistry and Chemical Engineering, University of Jinan, Jinan 250022, China.*

<sup>c</sup> *Inspection and Testing Center of Liangshan County, Jining 272600, China.*

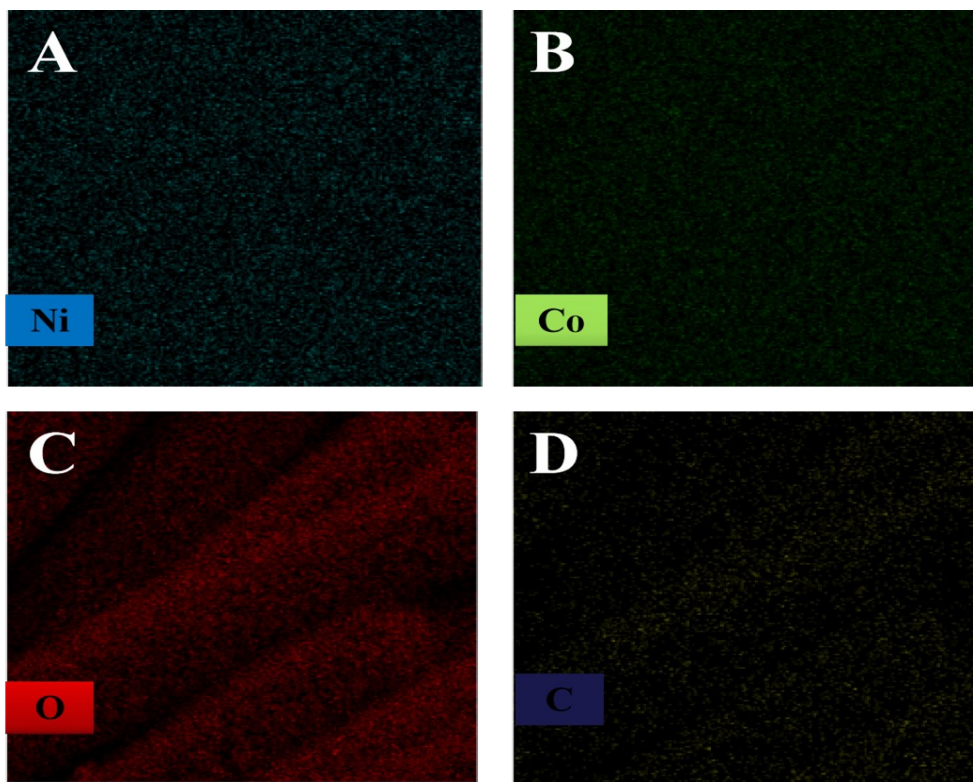

Fig. S1 (A, B, C, D) EDS Elemental analysis of Ni-Co LDH samples

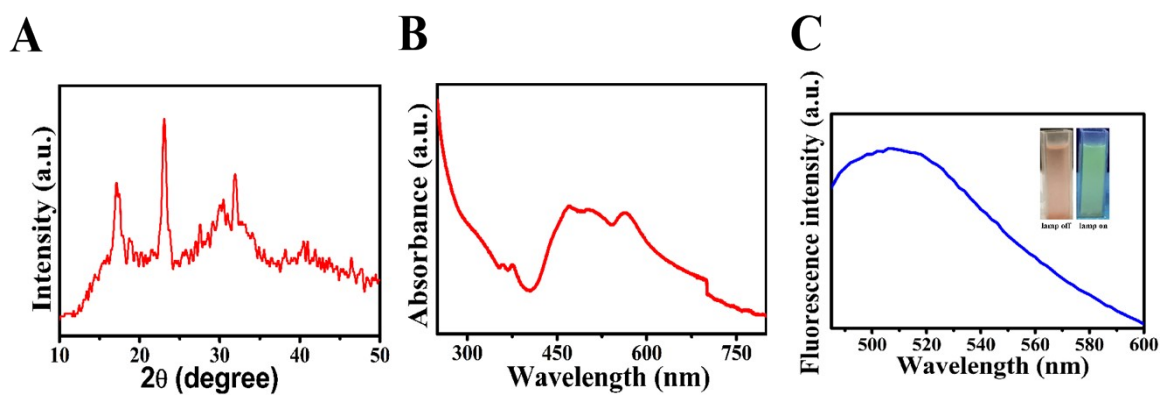

Fig. S2 (A) XRD patterns of PTCA. (B) UV-vis absorption spectrum of PTCA. (C) Fluorescence emission spectrum of PTCA.

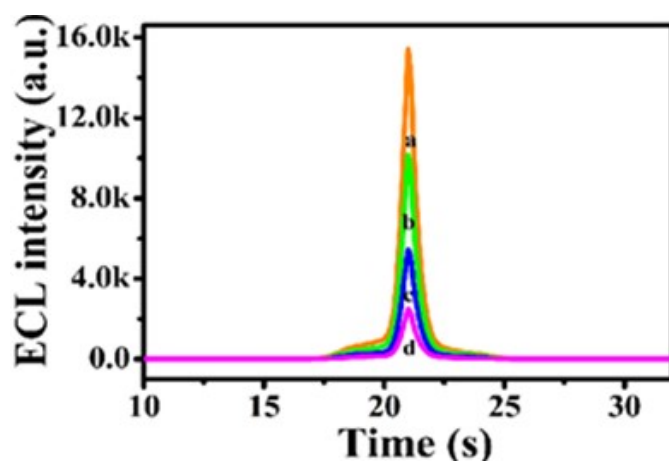

**Fig. S3** ECL intensity-time curves of different modified electrodes: (a) PTCA/N-Ti<sub>3</sub>C<sub>2</sub>/Ni-Co LDH/CC. (b) Eluted PTCA/N-Ti<sub>3</sub>C<sub>2</sub>/Ni-Co LDH/CC. (c) MIP/PTCA/N-Ti<sub>3</sub>C<sub>2</sub>/Ni-Co LDH/CC. (d) Rebinding MIP/PTCA/N-Ti<sub>3</sub>C<sub>2</sub>/Ni-Co LDH/CC.

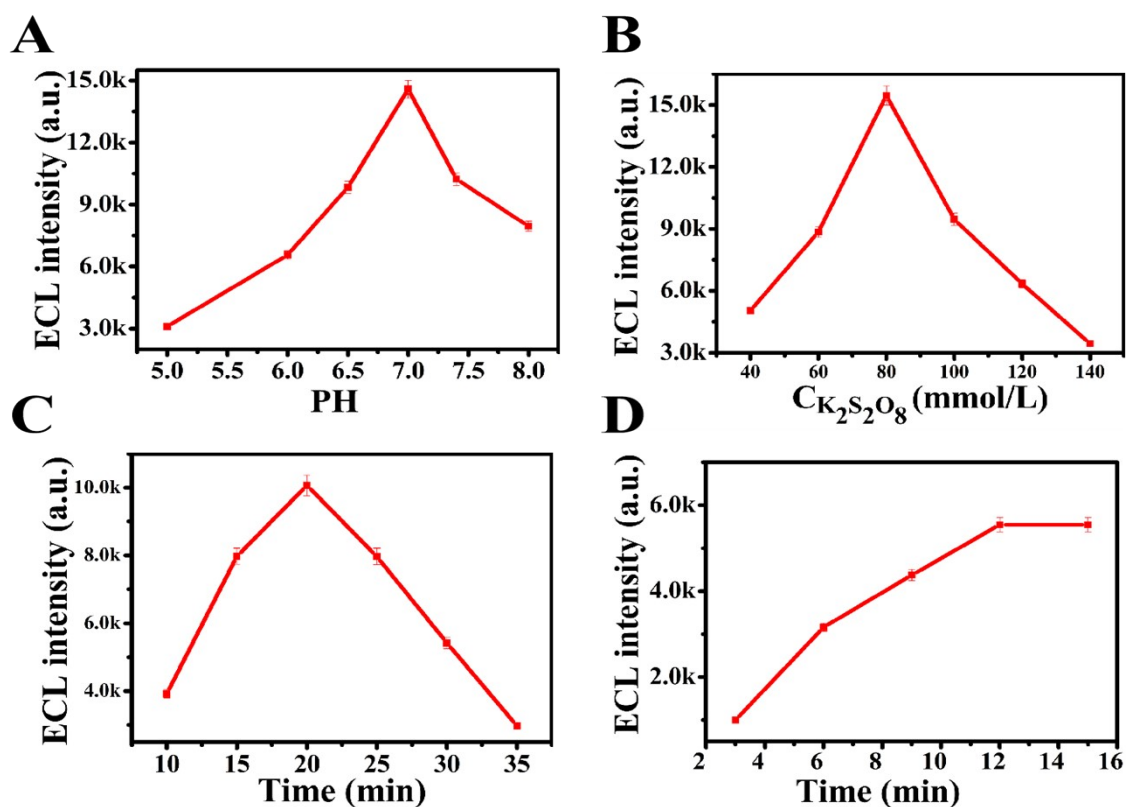

**Fig. S4** (A) The effect of pH on ECL intensity. (B) The effect of K<sub>2</sub>S<sub>2</sub>O<sub>8</sub> concentration on ECL intensity. (C) Effect of incubation time of MIP on ECL intensity. (D) The effect of elution time of template molecules on ECL intensity. Error bars = SD (n = 3)

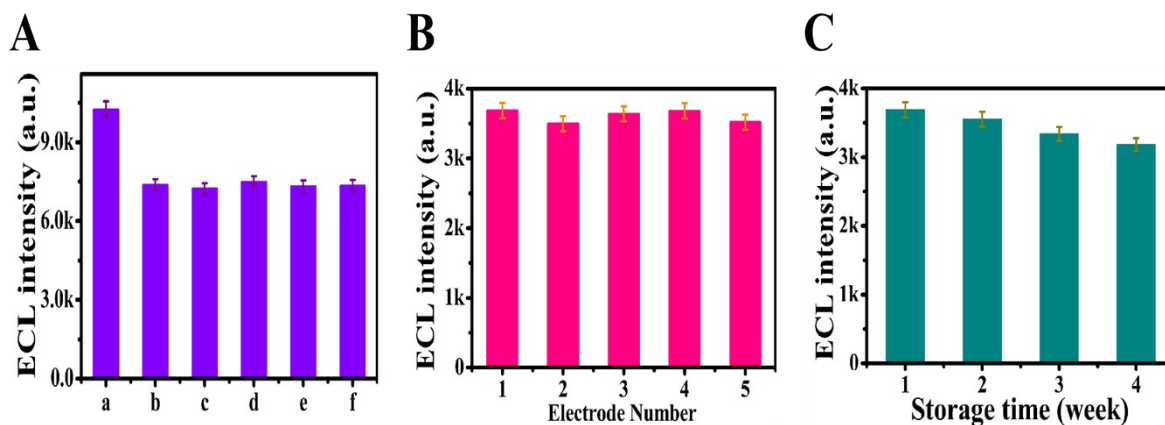

**Fig. S5** (A) Selectivity of MIECL sensors for different detectors: (a) Blank sample. (b) SPI. (c) SPI & Tylosin. (d) SPI & Azithromycin. (e) SPI & erythromycin. (f) SPI & josamycin. (B) Reproducibility of six MIECL sensors. (C) Storage Stability of MIECL Sensors. Error bars = SD (n = 3)

**Table S1.** Result and recovery of SPI measured by MIECL sensor

| Chicken sample | Detected ( $10^{-6}$ M) | Spiked ( $10^{-6}$ M) | Found ( $10^{-6}$ M) | RSD (%) | Recovery (%) |
|----------------|-------------------------|-----------------------|----------------------|---------|--------------|
| Sample 1       | 0.24                    | 0.10                  | 0.3413               | 3.75    | 101.3        |
| Sample 2       | 0.24                    | 0.30                  | 0.5381               | 4.06    | 99.37        |
| Sample 3       | 0.24                    | 0.60                  | 0.8295               | 2.61    | 98.25        |
